# Supplementary material for: Integration of Genome-Wide SNP Data and Gene-Expression Profiles Reveals Six Novel Loci and Regulatory Mechanisms for Amino Acids and Acylcarnitines in Whole Blood
Source: PLOS journal article supplement (doi:10.1371/journal.pgen.1005510), 2015-09-24

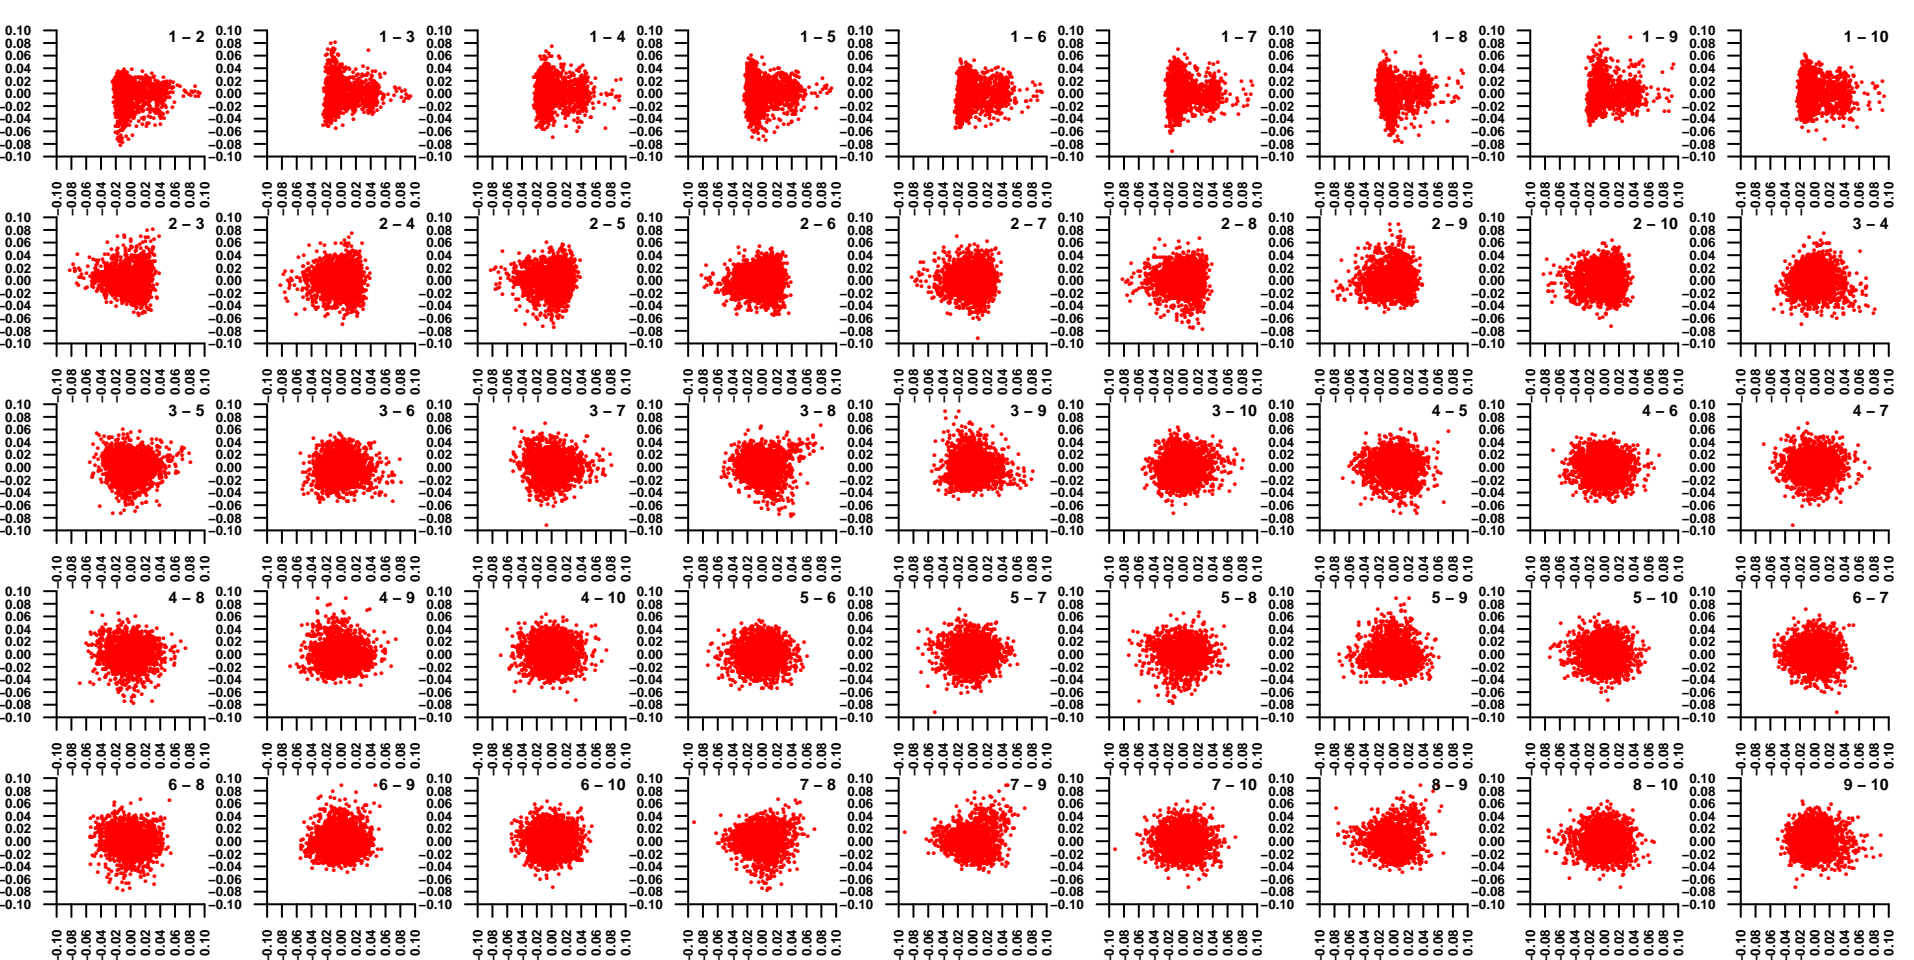

Supplement: S5 (10.1371/journal.pgen.1005510.s005) [file journal.pgen.1005510.s005]
