# Supplementary material for: Integration of Genome-Wide SNP Data and Gene-Expression Profiles Reveals Six Novel Loci and Regulatory Mechanisms for Amino Acids and Acylcarnitines in Whole Blood
Source: PLoS Genet. 2015 Sep 24;11(9):e1005510. doi: 10.1371/journal.pgen.1005510 (PMC4581711; doi:10.1371/journal.pgen.1005510)
Supplement: S11 Table — We used Ingenuity Pathway Analysis in order to identify previously published relationships between significant hits from our study shown in Fig 4 and S4 Fig. Locus: Locus of Molecule 1 and Molecule 2. Molecule 1 / 2: Molecules for which relation is described, SNPs are represented by their three nearest genes. mQTL: Molecule was observed as significant finding in the mQTL GWAS or replication of this study. eQTL: Molecule was observed as significant finding in the eQTL analysis of this study. gene—metab: Molecule was observed as significant finding in the gene-expression—metabolite association analysis of this study. Citation: Source of relation description.Prim./ Second. Relation: Prim. = primary relation, i.e. relation directly linking two molecules both observed as significant findings in this study, Sec. = secondary relation, i.e. Molecule 1 originates from this study and is related with a certain Molecule 2 from Ingenuity pathway-database. The pathway molecule is also related with a further Molecule 1 from this study written in the following on the next row. Hence, a secondary relation between Molecule 1 from the first and Molecule 1 from the second row via the same Molecule 2 from the database exists. Direct/Indirect Interaction: D = Direct Interaction: There is a physical interaction between Molecule 1 and Molecule 2, I = Indirect Interaction: Both molecules are related via a certain mechanism, but no physical interaction is reported yet. Interaction type: Interaction as defined in Ingenuity pathway analysis: A = Activation, CP = Chemical-Protein interaction, E = Expression (includes metabolism/ synthesis for chemicals), EC = Enzyme Catalysis, I = Inhibition, L = Molecular Cleavage (includes degradation for Chemicals), LO = Localization, M = Biochemical Modification MB = Group/complex Membership, P = Phosophorylation / Dephosphorylation, PP = Proten-Protein binding, RB = Regulation of Binding, RE = Reaction, T = Transcription, UB = Ubiquination; Relationship: S [file pgen.1005510.s019.xlsx]

## Sheet: Tab_S11
Locus	Molecule 1				Molecule 2				Citation	Prim./ Second. Relation	Direct/Indirect Interaction	Interaction type	Relationship
	ID	mQTL	eQTL	gene - metab	ID	mQTL	eQTL	gene - metab
2p13.1	L-ornithine	x	-	x	citrulline	x	-	-	http://humancyc.org/HUMAN/NEW-IMAGE?object=ORNCARBAMTRANSFER-RXN	Prim.	D	RE	Ornithine carbamoyltransferase catalyzes the following reaction: carbamoyl-phosphate + L-ornithine -> L-citrulline [citrulline] + H+ + phosphate.
2p13.1	L-ornithine	x	-	x	citrulline	x	-	-	http://enzyme.expasy.org/EC/3.5.1.20	Prim.	D	RE	Citrullinase catalyzes the following reaction: L-citrulline [citrulline] + H+ + H2O -> ammonia + CO2 + L-ornithine.
2p13.1	L-arginine	x	-	x	citrulline	x	-	-	21915076	Prim.	D	E	L-Citrulline [citrulline] increases quantity of L-arginine.
2p13.1	L-arginine	x	-	x	citrulline	x	-	-	16157883	Prim.	D	RE	In cytoplasm from endothelial cells, eNOS [NOS3] protein catalyzes the following reaction: L-Arginine -> L-Citrulline [citrulline] + NO [nitric oxide].
2p13.1	sarcosine	-	-	x	glycine	x	-	x	http://humancyc.org/HUMAN/NEW-IMAGE?object=SARCOX-RXN	Prim.	D	RE	Sarcosine oxidase catalyzes the following reaction: oxygen + sarcosine + H2O -> formaldehyde + glycine + hydrogen peroxide.
2p13.1	L-arginine	x	-	x	L-ornithine	x	-	x	http://humancyc.org/HUMAN/NEW-IMAGE?object=GLYCINE-AMIDINOTRANSFERASE-RXN	Prim.	D	EC & RE	Glycine amidinotransferase catalyzes the following reaction: glycine + L-arginine -> guanidinoacetate [glycocyamine] + L-ornithine.
2p13.1	L-arginine	x	-	x	glycine	x	-	x	http://humancyc.org/HUMAN/NEW-IMAGE?object=GLYCINE-AMIDINOTRANSFERASE-RXN	Prim.	D	EC & RE	Glycine amidinotransferase catalyzes the following reaction: glycine + L-arginine -> guanidinoacetate [glycocyamine] + L-ornithine.
2p13.1	glycine	x	-	x	L-ornithine	x	-	x	http://humancyc.org/HUMAN/NEW-IMAGE?object=GLYCINE-AMIDINOTRANSFERASE-RXN	Prim.	D	EC & RE	Glycine amidinotransferase catalyzes the following reaction: glycine + L-arginine -> guanidinoacetate [glycocyamine] + L-ornithine.
2q34	sarcosine	x	-	-	glycine	x	-	-	http://humancyc.org/HUMAN/NEW-IMAGE?object=SARCOX-RXN	Prim.	D	RE	Sarcosine oxidase catalyzes the following reaction: oxygen + sarcosine + H2O -> formaldehyde + glycine + hydrogen peroxide.
4q32.1	L-phenylalanine	-	-	x	L-tyrosine	-	-	x	http://humancyc.org/HUMAN/NEW-IMAGE?object=PHENYLALANINE-4-MONOOXYGENASE-RXN	Prim.	D	RE	Phenylalanine 4-monooxygenase catalyzes the following reaction: tetrahydrobiopterin [5,6,7,8-tetrahydrobiopterin] + L-phenylalanine + oxygen -> 4α-hydroxy-tetrahydrobiopterin [4a-hydroxytetrahydrobiopterin] + L-tyrosine.
6q23.2	ARG1	x	x	-	Arginase	x	x	-	Ingenuity Expert Findings	Prim.	D	MB	Human arginase has member human ARG1.
6q23.2	Arginase	x	x	-	L-ornithine	x	-	-	22281732	Prim.	I	A	Ornithine [L-ornithine] decreases activity of Arginase.
6q23.2	Arginase	x	x	-	L-ornithine	x	-	-	7507318	Prim.	I	I	L-ornithine increases inhibition of active arginase.
6q23.2	Arginase	x	x	-	L-ornithine	x	-	-	12813015	Prim.	I	L	Arginase protein(s) increases hydrolysis of arginine to ornithine [L-ornithine] and urea.
6q23.2	Arginase	x	x	-	L-arginine	x	-	-	9622506	Prim.	D	CP	Binding of liver arginase and L-arginine occurs.
6q23.2	Arginase	x	x	-	L-arginine	x	-	-	15894496	Prim.	D	L	Arginase protein(s) is involved in degradation of L-arginine.
6q23.2	Arginase	x	x	-	L-arginine	x	-	-	22028830	Prim.	D	L	Arginase increases hydrolysis of L-arginine.
6q23.2	Arginase	x	x	-	citrulline	x	-	-	22281732	Prim.	I	A	Citrulline decreases activity of Arginase.
6q23.2	ARG1	x	x	-	L-arginine	x	-	-	20153713	Prim.	I	L	Arginase I [ARG1] increases hydrolysis of L-arginine.
6q23.2	ARG1	x	x	-	L-ornithine	x	-	-	11221839	Prim.	I	E	In J-774A.1 cells, rat Arginase I [Arg1] protein increases production of ornithine [L-ornithine].
6q23.2	ARG1	x	x	-	L-ornithine	x	-	-	12052859	Prim.	I	E	Homozygous mutant mouse Arg1 gene (knockout) in mouse decreases quantity of ornithine [L-ornithine] in mouse plasma.
6q23.2	ARG1	x	x	-	L-ornithine	x	-	-	23179835	Prim.	I	E	Arginase I [ARG1] is involved in production of ornithine [L-ornithine].
6q23.2	ARG1	x	x	-	citrulline	x	-	-	12052859	Prim.	I	E	Homozygous mutant mouse Arg1 gene (knockout) in mouse increases quantity of citrulline in mouse plasma.
6q23.2	L-arginine	x	-	-	citrulline	x	-	-	21915076	Prim.	D	E	L-Citrulline [citrulline] increases quantity of L-arginine.
6q23.2	L-arginine	x	-	-	citrulline	x	-	-	16157883	Prim.	D	RE	In cytoplasm from endothelial cells, eNOS [NOS3] protein catalyzes the following reaction: L-Arginine -> L-Citrulline [citrulline] + NO [nitric oxide].
6q23.2	L-arginine	x	-	-	L-ornithine	x	-	-	http://humancyc.org/HUMAN/NEW-IMAGE?object=GLYCINE-AMIDINOTRANSFERASE-RXN	Prim.	D	EC & RE	Glycine amidinotransferase catalyzes the following reaction: glycine + L-arginine -> guanidinoacetate [glycocyamine] + L-ornithine.
6q23.2	L-arginine	x	-	-	glycine	x	-	-	http://humancyc.org/HUMAN/NEW-IMAGE?object=GLYCINE-AMIDINOTRANSFERASE-RXN	Prim.	D	EC & RE	Glycine amidinotransferase catalyzes the following reaction: glycine + L-arginine -> guanidinoacetate [glycocyamine] + L-ornithine.
6q23.2	glycine	x	-	-	L-ornithine	x	-	-	http://humancyc.org/HUMAN/NEW-IMAGE?object=GLYCINE-AMIDINOTRANSFERASE-RXN	Prim.	D	EC & RE	Glycine amidinotransferase catalyzes the following reaction: glycine + L-arginine -> guanidinoacetate [glycocyamine] + L-ornithine.
8q24.3	Alanine	x	-	x	citrulline	x	-	x	22921887	Prim.	I	E	Alanine decreases quantity of citrulline.
8q24.3	L-phenylalanine	-	-	x	L-tyrosine	-	-	x	http://humancyc.org/HUMAN/NEW-IMAGE?object=PHENYLALANINE-4-MONOOXYGENASE-RXN	Prim.	D	RE	Phenylalanine 4-monooxygenase catalyzes the following reaction: tetrahydrobiopterin [5,6,7,8-tetrahydrobiopterin] + L-phenylalanine + oxygen -> 4α-hydroxy-tetrahydrobiopterin [4a-hydroxytetrahydrobiopterin] + L-tyrosine.
between loci	ARG1	x	x	-	Alox5	x	-	-	21216893	Prim.	I	A	Homozygous mutant mouse 5-LO [Alox5] gene (knockout) in APC delta 468 mouse hematopoietic cells decreases activity of mouse arginase I [Arg1] protein in APC delta 468 mouse myeloid-derived suppressor cells.
between loci	D-aspartic acid	x	-	x	l-glutamine	-	-	x	15322243	Prim.	I	LO	In superfused synaptosomes, HIP-A decreases release of D-aspartate [D-aspartic acid] that is increased by l-glutamine.
between loci	D-aspartic acid	x	-	x	l-glutamine	-	-	x	15322243	Prim.	I	LO	In superfused synaptosomes, DL-threo-beta-benzyloxyaspartate decreases release of D-aspartate [D-aspartic acid] that is increased by l-glutamine.
between loci	D-aspartic acid	x	-	x	l-glutamine	-	-	x	15322243	Prim.	I	LO	In superfused synaptosomes, dihydrokainate decreases release of D-aspartate [D-aspartic acid] that is increased by l-glutamine.
between loci	D-aspartic acid	x	-	x	DDO	x	x	-	21757409	Prim.	I	L	D-aspartate oxidase [DDO] increases degradation of d-Aspartate [D-aspartic acid].
between loci	carnitine	x	-	x	Slc22a5	-	x	-	10454528	Prim.	D	CP	Sodium [Na+] increases the affinity of binding of carnitine and rat Octn2 [Slc22a5] protein.
between loci	carnitine	x	-	x	Slc22a5	-	x	-	17986647	Prim.	D	E	Heterozygous mutant mouse jvs [Slc22a5] gene (knockout) in mouse decreases content of carnitine in mouse liver.
between loci	Alanine	x	-	x	citrulline	x	-	x	22921887	Prim.	I	E	Alanine decreases quantity of citrulline.
between loci	ACADM	x	x	x	carnitine	x	-	x	16121256	Prim.	I	E	Mutant mouse Acadm gene (allele Acadmtm1Uab/Acadmtm1Uab) (homozygous knockout) in 129P2/OlaHsd * C57BL/6 mouse increases level of carnitine in blood.
between loci	CDK19	-	x	-	MED23	x	x	x	23602568	Prim.	D	PP	Binding of human CDK19 protein and human MED23 protein occurs.
1p31.1	ACADM	x	x	x	UBC				21139048	Sec.	D	PP	Binding of human ACADM protein and human UBC protein occurs.
1p31.1	RABGGTB	x	x	-	UBC				21139048	Sec.	D	PP	Binding of human RABGGTB protein and human UBC protein occurs.
1p31.1	MSH4	x	-	-	UBC				23964080	Sec.	D	PP	Binding of human MSH4 protein and human UBC protein occurs.
1q44	carnitine	x	-	-	PPARA				15654129	Sec.	I	E	Homozygous mutant mouse Ppara gene (knockout) in mouse decreases quantity of free carnitine in liver.
1q44	Acetyl-L-carnitine	x	-	-	PPARA				18026715	Sec.	I	E	Acetyl-L-carnitine (10mcM for 24 hours) and R (+) alpha-lipoic acid [D-thioctic acid] (10mcM for 24 hours) increase expression of mouse Ppara mRNA in 3T3-L1 cells.
1q44	Acetyl-L-carnitine	x	-	-	Erk1/2				17210450	Sec.	I	A	Acetyl-L-carnitine and alpha-lipoic acid [thioctic acid] increase activation of rat Erk1/2 protein(s) in primary rat cortical neurons.
1q44	JAM3	-	x	x	Erk1/2				11590146	Sec.	I	A & P	Interference of human JAM-B [JAM2] mRNA by siRNA and interference of human JAM-C [JAM3] mRNA by siRNA decrease phosphorylation of human p42/p44 erk [ERK1/2] protein(s) in 3D-cultured cultured HUVEC cells.
2p13.1	NMDA [N-methyl-D-aspartate]	x	-	x	FOS				9858769	Sec.	I	E	In brain, glycine increases expression of C-FOS [FOS] mRNA that is mediated by NMDA [N-methyl-D-aspartate].
2p13.1	Sarcosine	-	-	x	FOS				19944746	Sec.	I	E	Sarcosine decreases expression of c-Fos [FOS] mRNA that is increased by ketamine.
2p13.1	NAT8B	-	x	x	APP				19011241	Sec.	I	E	Interference of human ATASE1 [NAT8B] mRNA by siRNA decreases production of human A beta [product of APP] protein(s) in H4 cells.
2p13.1	L-arginine	x	-	x	APP				17094809	Sec.	I	M	Fibrillar amyloid beta [product of APP] protein(s) increases oxidative deamination of L-arginine that is dependent on NADPH.
2p13.1	L-arginine	x	-	x	Proinsulin				23959939	Sec.	I	L	Oral gavage of L-arginine increases localization of mouse Insulin [Proinsulin] protein(s) to plasma from male mouse exhibiting diet-induced obesity.
2p13.1	L-arginine	x	-	x	Proinsulin				22872579	Sec.	I	L	In mouse, homozygous mutant mouse Gprc6a gene (knockout) decreases secretion of mouse Insulin [Proinsulin] protein(s) from isolated mouse pancreatic islets that is increased by L-arginine.
2p13.1	L-arginine	x	-	x	Proinsulin				23275337	Sec.	I	L	Sertraline (30 mcM) causes little or no change in secretion of mouse Insulin [Proinsulin] protein(s) from isolated mouse pancreatic islets that is increased by L-arginine and KCl [potassium chloride].
2p13.1	L-arginine	x	-	x	Proinsulin				23696563	Sec.	I	L	In mouse, mutant mouse Sst gene (knockout) prevents first phase secretion of mouse Insulin [Proinsulin] protein(s) in mouse that is increased by IP of L-arginine (0.8 g/kg).
2p13.1	L-leucine	-	-	x	Proinsulin				20670938	Sec.	I	L	Alanine and L-glutamine and L-leucine increase release of mouse Insulin [Proinsulin] protein(s) from isolated perifused islets of Langerhans from mutant mouse with a homozygous knockout of mouse Hadh gene.
2p13.1	citrulline	x	-	-	Proinsulin				14736887	Sec.	I	L	Homozygous mutant mouse Sur1 [Abcc8] gene (knockout) in mouse increases release of mouse Insulin [Proinsulin] protein(s) in pancreatic islets that involves alanine and arginine and citrulline and glutamine and glycine and isoleucine and aspartic acid [L-aspartic acid] and glutamate [L-glutamic acid] and histidine [L-histidine] and lysine [L-lysine] and methionine [L-methionine] and ornithine [L-o…
2p13.1	citrulline	x	-	-	Proinsulin				18635551	Sec.	I	L	In mouse, homozygous mutant mouse SUR1 [Abcc8] gene (knockout) increases secretion of mouse Insulin [Proinsulin] protein(s) in isolated perifused mouse islet cells that is increased by arginine and citrulline and glutamine and glycine and isoleucine and aspartate [L-aspartic acid] and aspartate [L-aspartic acid] and glutamate [L-glutamic acid] and histidine [L-histidine] and lysine [L-lysine] and…
2p13.1	L-ornithine	x	-	x	Proinsulin				14736887	Sec.	I	L	Homozygous mutant mouse Sur1 [Abcc8] gene (knockout) in mouse increases release of mouse Insulin [Proinsulin] protein(s) in pancreatic islets that involves alanine and arginine and citrulline and glutamine and glycine and isoleucine and aspartic acid [L-aspartic acid] and glutamate [L-glutamic acid] and histidine [L-histidine] and lysine [L-lysine] and methionine [L-methionine] and ornithine [L-o…
2p13.1	L-ornithine	x	-	x	Proinsulin				18635551	Sec.	I	L	In mouse, homozygous mutant mouse SUR1 [Abcc8] gene (knockout) increases secretion of mouse Insulin [Proinsulin] protein(s) in isolated perifused mouse islet cells that is increased by arginine and citrulline and glutamine and glycine and isoleucine and aspartate [L-aspartic acid] and aspartate [L-aspartic acid] and glutamate [L-glutamic acid] and histidine [L-histidine] and lysine [L-lysine] and…
2p13.1	glycine	x	-	x	Proinsulin				14736887	Sec.	I	L	Homozygous mutant mouse Sur1 [Abcc8] gene (knockout) in mouse increases release of mouse Insulin [Proinsulin] protein(s) in pancreatic islets that involves alanine and arginine and citrulline and glutamine and glycine and isoleucine and aspartic acid [L-aspartic acid] and glutamate [L-glutamic acid] and histidine [L-histidine] and lysine [L-lysine] and methionine [L-methionine] and ornithine [L-o…
2p13.1	glycine	x	-	x	Proinsulin				18635551	Sec.	I	L	In mouse, homozygous mutant mouse SUR1 [Abcc8] gene (knockout) increases secretion of mouse Insulin [Proinsulin] protein(s) in isolated perifused mouse islet cells that is increased by arginine and citrulline and glutamine and glycine and isoleucine and aspartate [L-aspartic acid] and aspartate [L-aspartic acid] and glutamate [L-glutamic acid] and histidine [L-histidine] and lysine [L-lysine] and…
2p13.1	TPRKB	-	x	-	UBC				21139048	Sec.	D	PP	Binding of human TPRKB protein and human UBC protein occurs.
2p13.1	STAMBP	-	x	x	UBC				21139048	Sec.	D	PP	Binding of human STAMBP protein and human UBC protein occurs.
2p13.1	STAMBP	-	x	x	UBC				19373254	Sec.	D	PP & UB	Human STAMBP protein increases deubiquitination of ubiquitinated human UBC protein.
2q34	Sarcosine	x	-	-	FOS				19944746	Sec.	I	E	Sarcosine decreases expression of c-Fos [FOS] mRNA that is increased by ketamine.
2q34	glycine	x	-	-	FOS				9858769	Sec.	I	E	In brain, glycine increases expression of C-FOS [FOS] mRNA that is mediated by NMDA [N-methyl-D-aspartate].
2q34	LANCL1	x	-	-	HTT				17500595	Sec.	D	PP	Binding of mutant HTT protein (p.X91* or 91-End) and human LANCL1 protein in lysate from human brain occurs.
2q34	glycine	x	-	-	HTT				16512662	Sec.	I	E	In mouse urine, a transgenic protein fragment containing a polyq repeat from HUNTINGTIN [HTT] protein N-terminal domain is involved in quantity of glycine.
2q34	CPS1	x	-	-	cAMP				6090246	Sec.	I	E	Cyclic AMP increases induction of Cps [Cps1].
2q34	CPS1	x	-	-	cAMP				7518403	Sec.	I	E	Cyclic AMP increases induction of In vitro CPS [Cps1].
2q34	L-arginine	x	-	-	cAMP				22872579	Sec.	I	LO	In mouse, homozygous mutant mouse Gprc6a gene (knockout) decreases accumulation of cAMP [cyclic AMP] in isolated mouse pancreatic islets that is increased by L-arginine.
2q34	LANCL1	x	-	-	UBC				23000965	Sec.	D	PP	Binding of human LANCL1 protein and human UBC protein occurs.
2q34	CPS1	x	-	-	UBC				12938929	Sec.	D	PP	Binding of human CPS1 protein and human UBC protein occurs.
3q27.1	MCCC1	x	x	-	UBC				21139048	Sec.	D	PP	Binding of human MCCC1 protein and human UBC protein occurs.
3q27.1	ATP11B	x	-	-	UBC				21139048	Sec.	D	PP	Binding of human ATP11B protein and human UBC protein occurs.
3q27.1	DCUN1D1	x	-	-	UBC				21139048	Sec.	D	PP	Binding of human DCUN1D1 protein and human UBC protein occurs.
4q32.1	acylcarnitine	-	-	x	L-carnitin				23349733	Sec.	D	E	In serum from human exhibiting narcolepsy, oral administration of L-carnitine (510 mg/day, used here to treat narcolepsy) increases level of acylcarnitine.
4q32.1	acylcarnitine	-	-	x	L-carnitin				http://humancyc.org/HUMAN/NEW-IMAGE?object=RXN-9918	Sec.	D	RE	Carnitine O-palmitoyltransferase catalyzes the following reaction: L-carnitine + long-chain acyl-CoA [long-chain acyl-coenzyme A] -> O-acyl-L-carnitine [acylcarnitine] + coenzyme A.
4q32.1	acetyl-L-carnitine	-	-	x	L-carnitin				14703509	Sec.	I	E	In tissue from 22 month-old aged rat, acetyl-L-carnitine increases quantity of L-carnitine.
4q32.1	carnitine	-	-	x	palmitic acid				10341026	Sec.	I	M	Carnitine (1-100mM) increases oxidation of palmitic acid in pig osteoblastic cells.
4q32.1	carnitine	-	-	x	palmitic acid				11420304	Sec.	I	M	Carnitine in culture medium is necessary for oxidation of palmitate [palmitic acid] in cultured HUVEC cells that is increased by aicar.
4q32.1	carnitine	-	-	x	palmitic acid				15051838	Sec.	I	M	In mitochondria from liver of 7 week-old mouse, esterified cis-9-trans-11-octadecadienoic acid [9Z,11E-octadecadienoic acid] causes little or no change in the rate of oxidation of palmitate [palmitic acid] that is dependent on carnitine.
4q32.1	acetyl-L-carnitine	-	-	x	palmitic acid				18026715	Sec.	I	M	Acetyl-L-carnitine (10mcM for 24 hours) and R (+) alpha-lipoic acid [D-thioctic acid] (10mcM for 24 hours) increase oxidation of palmitate [palmitic acid] in 3T3-L1 cells.
4q32.1	L-phenylalanine	-	-	x	ERK1/2				19946178	Sec.	I	A	Phenylalanine [L-phenylalanine] increases activation of ERK1/2.
4q32.1	Acetyl-L-carnitine	-	-	x	ERK1/2				17210450	Sec.	I	A	Acetyl-L-carnitine and alpha-lipoic acid [thioctic acid] increase activation of rat Erk1/2 protein(s) in primary rat cortical neurons.
4q32.1	L-glutamine	-	-	x	ERK1/2				23275616	Sec.	I	E	AG1478 [tyrphostin AG 1478] decreases quantity of ERK1/2 that is mediated by L-glutamine.
4q32.1	L-leucine	-	-	x	Proinsulin				20670938	Sec.	I	L	Alanine and L-glutamine and L-leucine increase release of mouse Insulin [Proinsulin] protein(s) from isolated perifused islets of Langerhans from mutant mouse with a homozygous knockout of mouse Hadh gene.
4q32.1	L-ornithine	-	-	x	Proinsulin				14736887	Sec.	I	L	Homozygous mutant mouse Sur1 [Abcc8] gene (knockout) in mouse increases release of mouse Insulin [Proinsulin] protein(s) in pancreatic islets that involves alanine and arginine and citrulline and glutamine and glycine and isoleucine and aspartic acid [L-aspartic acid] and glutamate [L-glutamic acid] and histidine [L-histidine] and lysine [L-lysine] and methionine [L-methionine] and ornithine [L-o…
4q32.1	L-ornithine	-	-	x	Proinsulin				18635551	Sec.	I	L	In mouse, homozygous mutant mouse SUR1 [Abcc8] gene (knockout) increases secretion of mouse Insulin [Proinsulin] protein(s) in isolated perifused mouse islet cells that is increased by arginine and citrulline and glutamine and glycine and isoleucine and aspartate [L-aspartic acid] and aspartate [L-aspartic acid] and glutamate [L-glutamic acid] and histidine [L-histidine] and lysine [L-lysine] and…
4q32.1	L-phenylalanine	-	-	x	Proinsulin				14736887	Sec.	I	L	Homozygous mutant mouse Sur1 [Abcc8] gene (knockout) in mouse increases release of mouse Insulin [Proinsulin] protein(s) in pancreatic islets that involves alanine and arginine and citrulline and glutamine and glycine and isoleucine and aspartic acid [L-aspartic acid] and glutamate [L-glutamic acid] and histidine [L-histidine] and lysine [L-lysine] and methionine [L-methionine] and ornithine [L-o…
4q32.1	L-phenylalanine	-	-	x	Proinsulin				18635551	Sec.	I	L	In mouse, homozygous mutant mouse SUR1 [Abcc8] gene (knockout) increases secretion of mouse Insulin [Proinsulin] protein(s) in isolated perifused mouse islet cells that is increased by arginine and citrulline and glutamine and glycine and isoleucine and aspartate [L-aspartic acid] and aspartate [L-aspartic acid] and glutamate [L-glutamic acid] and histidine [L-histidine] and lysine [L-lysine] and…
4q32.1	L-glutamine	-	-	x	Proinsulin				20670938	Sec.	I	L	Alanine and L-glutamine and L-leucine increase release of mouse Insulin [Proinsulin] protein(s) from isolated perifused islets of Langerhans from mutant mouse with a homozygous knockout of mouse Hadh gene.
4q32.1	Alanine	-	-	x	Proinsulin				14736887	Sec.	I	L	Alanine and glutamine and lysine [L-lysine] and leucine increase secretion of mouse Insulin [Proinsulin] protein(s) in mouse pancreatic islets that involves homozygous mutant mouse Sur1 [Abcc8] gene (knockout) in mouse.
4q32.1	Alanine	-	-	x	Proinsulin				15175349	Sec.	I	L	In mouse pancreatic islets, tolbutamide increases secretion of mouse Insulin [Proinsulin] protein(s) that is increased by alanine and glutamine and lysine [L-lysine] and leucine.
4q32.1	Alanine	-	-	x	Proinsulin				20670938	Sec.	I	L	Alanine and L-glutamine and L-leucine increase release of mouse Insulin [Proinsulin] protein(s) from isolated perifused islets of Langerhans from mutant mouse with a homozygous knockout of mouse Hadh gene.
4q32.1	ETFDH	x	x	x	UBC				21139048	Sec.	D	PP	Binding of human ETFDH protein and human UBC protein occurs.
4q32.1	PPID	x	-	-	UBC				21139048	Sec.	D	PP	Binding of human PPID protein and human UBC protein occurs.
4q32.1	C4orf46	x	-	-	APP				21832049	Sec.	D	PP	Binding of human APP protein and human C4orf46 protein occurs.
4q32.1	PPID	x	-	-	APP				21832049	Sec.	D	PP	Binding of human APP protein and human PPID protein occurs.
5q31.1	acylcarnitine	x	-	-	L-carnitine				23349733	Sec.	D	E	In serum from human exhibiting narcolepsy, oral administration of L-carnitine (510 mg/day, used here to treat narcolepsy) increases level of acylcarnitine.
5q31.1	acylcarnitine	x	-	-	L-carnitine				http://humancyc.org/HUMAN/NEW-IMAGE?object=RXN-9918	Sec.	D	RE	Carnitine O-palmitoyltransferase catalyzes the following reaction: L-carnitine + long-chain acyl-CoA [long-chain acyl-coenzyme A] -> O-acyl-L-carnitine [acylcarnitine] + coenzyme A.
5q31.1	SLC22A4	x	x	x	L-carnitine				10825452	Sec.	D	CP	Interaction of Carnitine [L-carnitine] and rat OCTN1 [SLC22A4] occurs.
5q31.1	P4HA2	x	x	-	UBC				21139048	Sec.	D	PP	Binding of human P4HA2 protein and human UBC protein occurs.
5q31.1	SLC22A4	x	x	x	UBC				21906983	Sec.	D	PP	Binding of human SLC22A5 protein and human UBC protein occurs.
5q31.1	CDC42SE2	-	x	-	UBC				21906983	Sec.	D	PP	Binding of human CDC42SE2 protein and human UBC protein occurs.
5q31.1	PDLIM4	x	-	-	UBC				21139048	Sec.	D	PP	Binding of human PDLIM4 protein and human UBC protein occurs.
5q31.1	RAD50	-	x	-	UBC				21906983	Sec.	D	PP	Binding of human RAD50 protein and human UBC protein occurs.
6q21	carnitine	x	-	-	PPARA				15654129	Sec.	I	E	Homozygous mutant mouse Ppara gene (knockout) in mouse decreases quantity of free carnitine in liver.
6q21	Acetyl-L-carnitine	x	-	-	PPARA				18026715	Sec.	I	E	Acetyl-L-carnitine (10mcM for 24 hours) and R (+) alpha-lipoic acid [D-thioctic acid] (10mcM for 24 hours) increase expression of mouse Ppara mRNA in 3T3-L1 cells.
6q21	acylcarnitine	x	-	x	TFAM				23473319	Sec.	I	L	In mouse Schwann cells, mutant mouse Tfam gene (knockout) increases accumulation of acylcarnitine in culture medium from mouse nerves.
6q21	Acetyl-L-carnitine	x	-	-	TFAM				18026715	Sec.	I	E	Acetyl-L-carnitine (10mcM for 24 hours) and R (+) alpha-lipoic acid [D-thioctic acid] (10mcM for 24 hours) increase expression of mouse Tfam protein in mitochondria from 3T3-L1 cells.
6q21	L-leucine	x	-	-	Insulin				22120830	Sec.	I	L	L-leucine increases secretion of insulin.
6q21	Alanine	x	-	-	Insulin				23985558	Sec.	I	L	Alanine increases release of Insulin.
6q21	propionylcarnitine	x	-	-	EGFR				22969147	Sec.	I	E	Transgenic mutant human EGFR protein (p.[T790M;L858R] with its TK domain mutated) in mouse with a lung adenocarcinoma increases quantity of propionylcarnitine in lung tissue from mouse with a lung adenocarcinoma.
6q21	AMD1	-	x	x	EGFR				15090615	Sec.	I	T	Human EGFR protein is necessary for transcriptional response of human AMD1 mRNA that is increased by Raf-1 protein.
6q21	DDO	x	x	-	UBC				21906983	Sec.	D	PP	Binding of human DDO protein and human UBC protein occurs.
6q21	AMD1	-	x	x	UBC				21906983	Sec.	D	PP	Binding of human AMD1 protein and human UBC protein occurs.
6q21	RPF2	-	x	-	UBC				21139048	Sec.	D	PP	Binding of human RPF2 protein and human UBC protein occurs.
6q23.2	Enpp3	x	-	-	TNF				17652167	Sec.	I	E	Rat TNF-alpha [Tnf] protein decreases expression of rat Enpp3 mRNA in rat fibroblast-like synoviocytes.
6q23.2	glycine	x	-	-	TNF				10064624	Sec.	I	E	Glycine decreases expression of human TNF-alpha [TNF] mRNA that is increased by lipopolysaccharide.
6q23.2	ARG1	x	x	-	TNF				12507903	Sec.	I	E	In primary culture keratinocytes, IFN gamma [IFNG] protein and IL-1beta [IL1B] protein and TNF-alpha [TNF] protein decrease expression of human ARG1 mRNA.
6q23.2	ARG1	x	x	-	TNF				17413034	Sec.	I	E	Homozygous mutant mouse Tnf gene (knockout) in Mus musculus (mouse) decreases expression of mouse arginase I [Arg1] protein in arteriole from Mus musculus (mouse) heart that is increased by ischemia-reperfusion injury of heart from Mus musculus (mouse).
6q23.2	ARG1	x	x	-	TNF				17119118	Sec.	I	L	TNFA [TNF] protein increases release of human ARG1 protein from neutrophils from human peripheral blood.
6q23.2	MED23	x	x	x	PPARA				12189208	Sec.	D	PP	Binding of CRSP130 [MED23] protein and phosphorylated PPARα [PPARA] protein occurs in nuclei.
6q23.2	ARG1	x	x	-	PPARA				15226431	Sec.	I	E	Activation of mouse Ppara protein in liver from mouse decreases expression of mouse Arg-1 protein.
6q23.2	L-arginine	x	-	-	Proinsulin				23959939	Sec.	I	L	Oral gavage of L-arginine increases localization of mouse Insulin [Proinsulin] protein(s) to plasma from male mouse exhibiting diet-induced obesity.
6q23.2	L-arginine	x	-	-	Proinsulin				22872579	Sec.	I	L	In mouse, homozygous mutant mouse Gprc6a gene (knockout) decreases secretion of mouse Insulin [Proinsulin] protein(s) from isolated mouse pancreatic islets that is increased by L-arginine.
6q23.2	L-arginine	x	-	-	Proinsulin				23275337	Sec.	I	L	Sertraline (30 mcM) causes little or no change in secretion of mouse Insulin [Proinsulin] protein(s) from isolated mouse pancreatic islets that is increased by L-arginine and KCl [potassium chloride].
6q23.2	L-arginine	x	-	-	Proinsulin				23696563	Sec.	I	L	In mouse, mutant mouse Sst gene (knockout) prevents first phase secretion of mouse Insulin [Proinsulin] protein(s) in mouse that is increased by IP of L-arginine (0.8 g/kg).
6q23.2	citrulline	x	-	-	Proinsulin				14736887	Sec.	I	L	Homozygous mutant mouse Sur1 [Abcc8] gene (knockout) in mouse increases release of mouse Insulin [Proinsulin] protein(s) in pancreatic islets that involves alanine and arginine and citrulline and glutamine and glycine and isoleucine and aspartic acid [L-aspartic acid] and glutamate [L-glutamic acid] and histidine [L-histidine] and lysine [L-lysine] and methionine [L-methionine] and ornithine [L-o…
6q23.2	citrulline	x	-	-	Proinsulin				18635551	Sec.	I	L	In mouse, homozygous mutant mouse SUR1 [Abcc8] gene (knockout) increases secretion of mouse Insulin [Proinsulin] protein(s) in isolated perifused mouse islet cells that is increased by arginine and citrulline and glutamine and glycine and isoleucine and aspartate [L-aspartic acid] and aspartate [L-aspartic acid] and glutamate [L-glutamic acid] and histidine [L-histidine] and lysine [L-lysine] and…
6q23.2	L-ornithine	x	-	-	Proinsulin				14736887	Sec.	I	L	Homozygous mutant mouse Sur1 [Abcc8] gene (knockout) in mouse increases release of mouse Insulin [Proinsulin] protein(s) in pancreatic islets that involves alanine and arginine and citrulline and glutamine and glycine and isoleucine and aspartic acid [L-aspartic acid] and glutamate [L-glutamic acid] and histidine [L-histidine] and lysine [L-lysine] and methionine [L-methionine] and ornithine [L-o…
6q23.2	L-ornithine	x	-	-	Proinsulin				18635551	Sec.	I	L	In mouse, homozygous mutant mouse SUR1 [Abcc8] gene (knockout) increases secretion of mouse Insulin [Proinsulin] protein(s) in isolated perifused mouse islet cells that is increased by arginine and citrulline and glutamine and glycine and isoleucine and aspartate [L-aspartic acid] and aspartate [L-aspartic acid] and glutamate [L-glutamic acid] and histidine [L-histidine] and lysine [L-lysine] and…
6q23.2	glycine	x	-	-	Proinsulin				14736887	Sec.	I	L	Homozygous mutant mouse Sur1 [Abcc8] gene (knockout) in mouse increases release of mouse Insulin [Proinsulin] protein(s) in pancreatic islets that involves alanine and arginine and citrulline and glutamine and glycine and isoleucine and aspartic acid [L-aspartic acid] and glutamate [L-glutamic acid] and histidine [L-histidine] and lysine [L-lysine] and methionine [L-methionine] and ornithine [L-o…
6q23.2	glycine	x	-	-	Proinsulin				18635551	Sec.	I	L	In mouse, homozygous mutant mouse SUR1 [Abcc8] gene (knockout) increases secretion of mouse Insulin [Proinsulin] protein(s) in isolated perifused mouse islet cells that is increased by arginine and citrulline and glutamine and glycine and isoleucine and aspartate [L-aspartic acid] and aspartate [L-aspartic acid] and glutamate [L-glutamic acid] and histidine [L-histidine] and lysine [L-lysine] and…
8q24.3	L-phenylalanine	-	-	x	ERK1/2				19946178	Sec.	I	A	Phenylalanine [L-phenylalanine] increases activation of ERK1/2.
8q24.3	Acetyl-L-carnitine	x	-	x	ERK1/2				17210450	Sec.	I	A	Acetyl-L-carnitine and alpha-lipoic acid [thioctic acid] increase activation of rat Erk1/2 protein(s) in primary rat cortical neurons.
8q24.3	L-leucine	-	-	x	Proinsulin				20670938	Sec.	I	L	Alanine and L-glutamine and L-leucine increase release of mouse Insulin [Proinsulin] protein(s) from isolated perifused islets of Langerhans from mutant mouse with a homozygous knockout of mouse Hadh gene.
8q24.3	citrulline	x	-	x	Proinsulin				14736887	Sec.	I	L	Homozygous mutant mouse Sur1 [Abcc8] gene (knockout) in mouse increases release of mouse Insulin [Proinsulin] protein(s) in pancreatic islets that involves alanine and arginine and citrulline and glutamine and glycine and isoleucine and aspartic acid [L-aspartic acid] and glutamate [L-glutamic acid] and histidine [L-histidine] and lysine [L-lysine] and methionine [L-methionine] and ornithine [L-o…
8q24.3	citrulline	x	-	x	Proinsulin				18635551	Sec.	I	L	In mouse, homozygous mutant mouse SUR1 [Abcc8] gene (knockout) increases secretion of mouse Insulin [Proinsulin] protein(s) in isolated perifused mouse islet cells that is increased by arginine and citrulline and glutamine and glycine and isoleucine and aspartate [L-aspartic acid] and aspartate [L-aspartic acid] and glutamate [L-glutamic acid] and histidine [L-histidine] and lysine [L-lysine] and…
8q24.3	L-leucine	-	-	x	Proinsulin				20670938	Sec.	I	L	Alanine and L-glutamine and L-leucine increase release of mouse Insulin [Proinsulin] protein(s) from isolated perifused islets of Langerhans from mutant mouse with a homozygous knockout of mouse Hadh gene.
8q24.3	L-phenylalanine	-	-	x	Proinsulin				14736887	Sec.	I	L	Homozygous mutant mouse Sur1 [Abcc8] gene (knockout) in mouse increases release of mouse Insulin [Proinsulin] protein(s) in pancreatic islets that involves alanine and arginine and citrulline and glutamine and glycine and isoleucine and aspartic acid [L-aspartic acid] and glutamate [L-glutamic acid] and histidine [L-histidine] and lysine [L-lysine] and methionine [L-methionine] and ornithine [L-o…
8q24.3	L-phenylalanine	-	-	x	Proinsulin				18635551	Sec.	I	L	In mouse, homozygous mutant mouse SUR1 [Abcc8] gene (knockout) increases secretion of mouse Insulin [Proinsulin] protein(s) in isolated perifused mouse islet cells that is increased by arginine and citrulline and glutamine and glycine and isoleucine and aspartate [L-aspartic acid] and aspartate [L-aspartic acid] and glutamate [L-glutamic acid] and histidine [L-histidine] and lysine [L-lysine] and…
8q24.3	Alanine	x	-	x	Proinsulin				14736887	Sec.	I	L	Alanine and glutamine and lysine [L-lysine] and leucine increase secretion of mouse Insulin [Proinsulin] protein(s) in mouse pancreatic islets that involves homozygous mutant mouse Sur1 [Abcc8] gene (knockout) in mouse.
8q24.3	Alanine	x	-	x	Proinsulin				15175349	Sec.	I	L	In mouse pancreatic islets, tolbutamide increases secretion of mouse Insulin [Proinsulin] protein(s) that is increased by alanine and glutamine and lysine [L-lysine] and leucine.
8q24.3	Alanine	x	-	x	Proinsulin				20670938	Sec.	I	L	Alanine and L-glutamine and L-leucine increase release of mouse Insulin [Proinsulin] protein(s) from isolated perifused islets of Langerhans from mutant mouse with a homozygous knockout of mouse Hadh gene.
8q24.3	ZNF34	-	x	-	UBC				22505724	Sec.	D	PP	Binding of human UBC protein and human ZNF34 protein occurs.
8q24.3	VPS28	-	x	-	UBC				21139048	Sec.	D	PP	Binding of human UBC protein and human VPS28 protein occurs.
8q24.3	LRRC14	-	x	x	UBC				21139048	Sec.	D	PP	Binding of human LRRC14 protein and human UBC protein occurs.
8q24.3	CYHR1	x	x	x	UBC				21906983	Sec.	D	PP	Binding of human CYHR1 protein and human UBC protein occurs.
8q24.3	COMMD5	-	x	-	UBC				21963094	Sec.	D	PP	Binding of human COMMD5 protein and human UBC protein occurs.
8q24.3	RPL8	-	x	-	UBC				21139048	Sec.	D	PP	Binding of human RPL8 protein and human UBC protein occurs.
8q24.3	MFSD3	-	x	-	UBC				21139048	Sec.	D	PP	Binding of human MFSD3 protein and human UBC protein occurs.
9q34.11	TBC1D13	-	x	-	UBC				21139048	Sec.	D	PP	Binding of human TBC1D13 protein and human UBC protein occurs.
9q34.11	PPP2R4	x	x	x	UBC				21139048	Sec.	D	PP	Binding of human PPP2R4 protein and human UBC protein occurs.
9q34.11	ENDOG	-	x	-	UBC				21906983	Sec.	D	PP	Binding of human ENDOG protein and human UBC protein occurs.
9q34.11	SH3GLB2	x	x	-	UBC				21139048	Sec.	D	PP	Binding of human SH3GLB2 protein and human UBC protein occurs.
10q11.21	Acetyl-L-carnitine	x	-	-	TP53				20562210	Sec.	I	M & LO	Acetyl-L-carnitine increases accumulation of human P53 [TP53] protein in nude mouse tumor derived from NCI-H460 cells that is increased by cisplatin.
10q11.21	ALOX5	x	-	-	TP53				15616590	Sec.	D	A & P	In fibroblasts from embryonic mouse, 5-Lo [ALOX5] protein increases phosphorylation of mouse p53 [Trp53] protein to phosphorylated (S15) mouse p53 [Trp53] protein.
10q11.21	ALOX5	x	-	-	TP53				17018618	Sec.	D	E & RB	P53 [TP53] protein increases expression of human 5-LOX [ALOX5] mRNA in DU145 cells.
10q11.21	FAM21A/FAM21C	-	x	-	UBC				21139048	Sec.	D	PP	Binding of human FAM21A protein and human UBC protein occurs.
10q11.21	MARCH8	x	-	-	UBC				23400868	Sec.	D	PP	Binding of human MARCH8 protein and human UBC protein occurs.
10q21.2	ANK3	x	-	-	UBC				21139048	Sec.	D	PP	Binding of human ANK3 protein and human UBC protein occurs.
10q21.2	CCDC6	x	-	-	UBC				21139048	Sec.	D	PP	Binding of human CCDC6 protein and human UBC protein occurs.
10q21.2	SLC16A9	x	-	-	UBC				21890473	Sec.	D	PP	Binding of human SLC16A9 protein and human UBC protein occurs.
12q24.31	Cabp1	x	-	-	TNF				11748220	Sec.	I	E	In smooth muscle cells from rat aorta, IL1B protein and TNF-alpha [TNF] protein decrease expression of rat Cabp1 mRNA.
12q24.31	ACADS	x	-	-	TNF				12732648	Sec.	I	E	In 3T3-L1 cells, troglitazone increases expression of mouse Short Chain Acyl coA Dehydrogenase [Acads] mRNA that is decreased by Tnf alpha [TNF] protein.
12q24.31	SPPL3	x	-	-	UBC				21963094	Sec.	D	PP	Binding of human SPPL3 protein and human UBC protein occurs.
12q24.31	COQ5	-	x	-	UBC				21890473	Sec.	D	PP	Binding of human COQ5 protein and human UBC protein occurs.
12q24.31	CAMKK2	-	x	-	UBC				21890473	Sec.	D	PP	Binding of human CAMKK2 protein and human UBC protein occurs.
12q24.31	MLEC	x	x	-	UBC				21139048	Sec.	D	PP	Binding of human MLEC protein and human UBC protein occurs.
12q24.31	RNF10	-	x	-	UBC				21139048	Sec.	D	PP	Binding of human RNF10 protein and human UBC protein occurs.
15q22.2	TPM1	x	x	-	UBC				21139048	Sec.	D	PP	Binding of human TPM1 protein and human UBC protein occurs.
15q22.2	RPS27L	x	-	-	UBC				21139048	Sec.	D	PP	Binding of human RPS27L protein and human UBC protein occurs.
15q22.2	APH1B	-	x	-	UBC				21890473	Sec.	D	PP	Binding of human APH1B protein and human UBC protein occurs.
15q22.2	CA12	x	-	-	UBC				21139048	Sec.	D	PP	Binding of human CA12 protein and human UBC protein occurs.
